# Supplementary material for: Overcoming the blood–brain barrier for glioma-targeted therapy based on an interleukin-6 receptor-mediated micelle system
Source: Royal Society of Chemistry journal article supplement (doi:10.1039/c7ra03208k), 2017-01-01
Supplement: c7ra03208k1.pdf [file c7ra03208k1.pdf]

## **Overcoming the blood-brain barrier for glioma-targeted therapy based on an interleukin-6 receptor-mediated micelle system**

Wei Shi,<sup>b</sup> Xuexue Cui<sup>a</sup>, Jinlong Shi,<sup>b</sup> Jian Chen<sup>b</sup> and Yi Wang<sup>\*a,c</sup>

<sup>a</sup> Center for Advanced Low-dimension Materials, Donghua University, Shanghai 201620, China

<sup>b</sup> Department of Neurosurgery, Affiliated Hospital of Nantong University, Nantong 226001, China

<sup>c</sup> Center of Analysis and Measurement, Fudan University, Shanghai 200433, China.

Correspondence:

Prof. Yi Wang,

Center for Advanced Low-dimension Materials, Donghua University, Shanghai 201620, China.

Email: ywang@dhu.edu.cn

### **Drug release**

The *in vitro* DOX release was studied in PBS (pH 7.4). DOX-loaded micelles were dialyzed (MWCO = 5000) for 24 h at 37 °C. During the dialysis process, 10 ml release medium was removed at determined time points and equal volume of fresh PBS (prewarmed at 37 °C) was supplemented immediately. The amount of DOX was detected using a fluorescence spectrophotometer to calculate the cumulative DOX release from different micelles. All experiments were repeated four times.

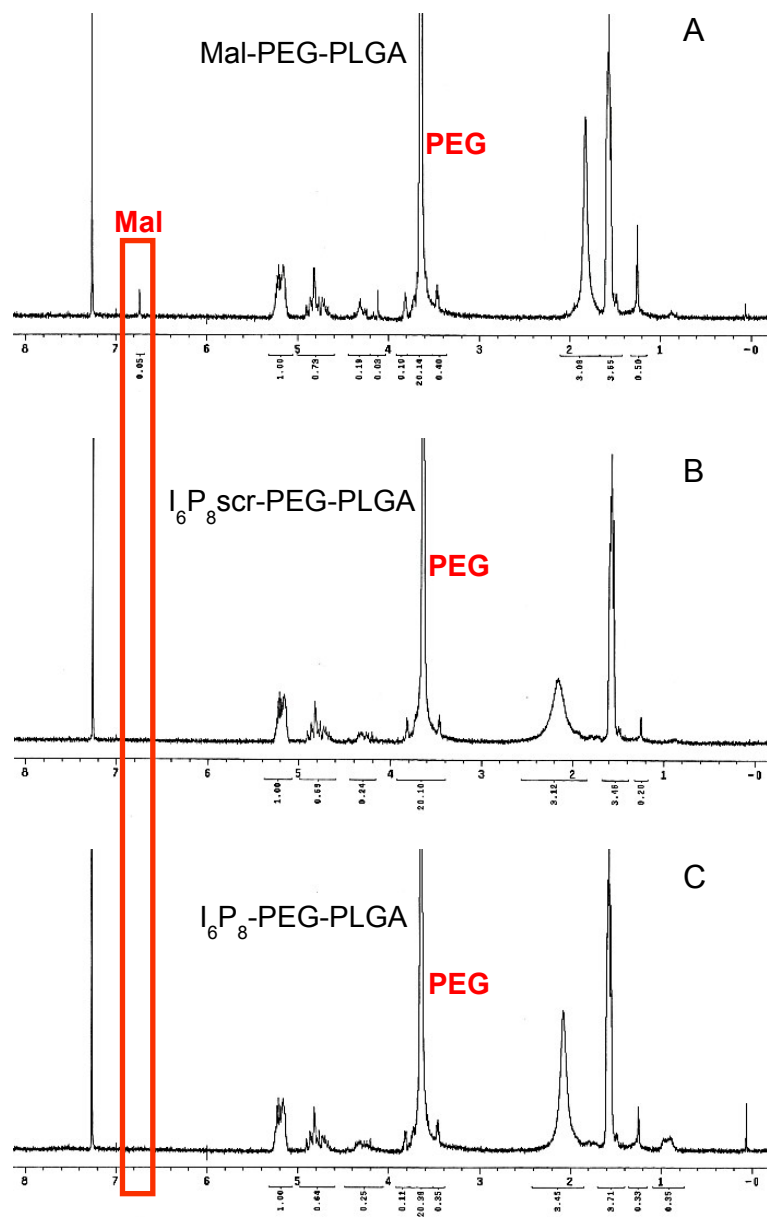

**Fig. S1.** NMR spectra of different polymers.

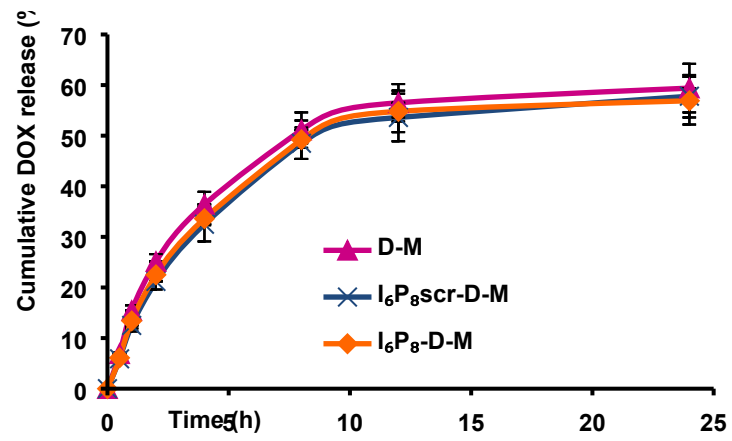

**Fig. S2.** The cumulative DOX release from different micelles for 24 h. Data were represented as Mean  $\pm$  S.D. (n = 4).
